# Supplementary material
Source: Springer Nature journal article supplement (https://www.springermedizin.de/resource/supplementary/13002_2013_399_MOESM5_ESM.docx/9626822)
Supplement: MOESM5 [file 9626822]

Table 2. Bivariate correlation coefficients (N).

|  | How often do you use medicinal plants? | Number of medicinal plants in the garden | Total number of plants named | Age | Number of years in urban areas | Number of years in a colonia |
| --- | --- | --- | --- | --- | --- | --- |
| How often do you use medicinal plants? |  |  |  |  |  |  |
| Number of medicinal plants in the garden | .265**  (152) |  |  |  |  |  |
| Total number of plants named | .328**  (152) | .496**  (153) |  |  |  |  |
| Age | .205*  (152) | .214**  (153) | .156  (153) |  |  |  |
| Number of years in urban areas | -.014  (146) | -.069  (147) | .007  (147) | .192*  (147) |  |  |
| Number of years in a colonia | .047  (146) | .104  (147) | .081  (147) | .360**  (147) | -.277**  (147) |  |
| Number of years in seringal | .221**  (147) | .247**  (148) | .127  (148) | .663**  (148) | -.403**  (147) | .007  (147) |

* p < .05

** p < .01
